# Supplementary material for: A New Pathway for Mannitol Metabolism in Yeasts Suggests a Link to the Evolution of Alcoholic Fermentation
Source: Front Microbiol. 2019 Nov 1;10:2510. doi: 10.3389/fmicb.2019.02510 (PMC6838020; doi:10.3389/fmicb.2019.02510)
Supplement: Supplementary file 1 [file Data_Sheet_1.xlsx]

## Sheet: Figure 4A_Fructophily
		GLUCOSE							FRUCTOSE							OD640nm
	Time (h)	g/L					Average	Moving Average	Fructose					Average	Moving Average			Average	Moving Average
wt, 30ºC	0	120.086	100	97		97	103.522		110.449	87	100		87	96.1123		0.2	0.2	0.2
	0.1	120.086	100	97		97	103.522	103.522	110.449	87	100		87	96.1123	96.1123			0.2	0.2
	28		84	87		87	86	94.7608	95.62	41	37		41	53.655	74.8836	37.9	40	38.95	38.95
	52	62.278	72	78		78	72.5695	79.2848	21.094	20	7		20	17.0235	35.3392	42.6	52	47.3	43.125
	76	49.54	30	49		49	44.385	58.4772	15.245	2	0		2	4.81125	10.9174	58.1	63	60.55	53.925
	124	4.364	0	27		0	7.841	26.113	2.617	1	0		0	0.90425	2.85775	75.7	78	76.85	68.7
	149	0					0	3.9205	0					0	0.452125	75.2	74	74.6	75.725
	Time (h)	g/L Glucose				Average	Moving Average		Fructose g/L				Average	Moving Average	OD640nm		Average	Moving Average
mtdh1Δ, 30ºC	0	120.086	120.086	110	110	115.043			110.449	110.449	120	120	115.225		0.2	0.2	0.2
	0.1	120.086	120.086	110	110	115.043	115.043		110.449	110.449	120	120	115.225	115.225	0.2	0.2	0.2	0.2
	28	147.49	123.466	74	62	101.739	108.391		95.219	72.322	48	36	62.8852	89.0549	30.2	37.1	33.65	11.35
	52	56.701	60.873	56	61	58.6435	80.1912		26.082	25.602	26	25	25.671	44.2781	24.9	30.1	27.5	30.575
	76	32.673	39.246	32	39	35.7298	47.1866		18.84	19.182	19	19	19.0055	22.3382	25.8	23.1	24.45	25.975
	124	1.614	2.726	1.5	2.7	2.135	18.9324		11.379	13.928	12	14	12.8268	15.9161	22.2	35.5	28.85	26.65
	149	0	0	0	0	0	1.0675		7.614	10.492			9.053	10.9399	20.9	28.6	24.75	26.8
	Time (h)	g/L Glucose				Average	Moving Average		Fructose g/L				Average	Moving Average	OD640nm		Average	Moving Average
mtdh1Δmtdh2Δ, 30ºC	0	120.086	120.086			120.086			110.449	110.449			110.449		0.2	0.2	0.2
	0.1	120.086	120.086			120.086	120.086		110.449	110.449			110.449	110.449	0.2	0.2	0.2	0.2
	28	111.718	120.127			115.922	118.004		72.349	75.159			73.754	92.1015	35.5	32.5	34	11.4667
	52	59.095	70.632			64.8635	90.393		30.112	32.325			31.2185	52.4862	26	27	26.5	30.25
	76	36.141	71.98			54.0605	59.462		21.307	33.419			27.363	29.2907	25.1	28.8	26.95	26.725
	124	6.422	27.002			16.712	35.3863		6.894	22.535			14.7145	21.0388	28	35.3	31.65	29.3
	149	5.713	16.612			11.1625	13.9372		6.542	18.961			12.7515	13.733	24.3	36.5	30.4	31.025

## Sheet: Figure 4B_20FG
		wt		mtdh1Δ		mtdh1Δmtdh2Δ
	Time (hours)	#1	Moving Average	#1	Moving Average	#1	#2	Average	Moving Average
25ºC	0	0.2		0.2		0.2	0.2	0.2
	0.1	0.2	0.2	0.2	0.2			0.2	0.2
	22	44.5	22.35	43.5	21.85	36.1	34.2	35.15	17.675
	29	54	49.25	51	47.25	52	42	47	41.075
	52	73	63.5	60	55.5	53	66	59.5	53.25
	76	85	79	82	71	65	58	61.5	60.5
	102	97	91	86	84	70	80	75	68.25
	126	130	113.5	110	98	94	102	98	86.5
	150	134	132	120	115	90	118	104	101
		wt				mtdh1Δ						mtdh1Δmtdh2Δ						mdh2
30ºC	Time (hours)	#1	#2	Average	Moving Average	#1	#2	#3	#4	Average	Moving Average	#1	#2	#3	#4	Average	Moving Average	#1	#2	#3	#4	Average	Moving Average
	0	0.2	0.2	0.2		0.2	0.2	0.2	0.2	0.2		0.2	0.2	0.2	0.2	0.2		0.2	0.2	0.2	0.2	0.2
	0.1	0.2	0.2	0.2	0.2					0.2	0.2					0.2	0.2					0.2	0.2
	28	37.9	40	38.95	19.575	30.2	37.1	32	32	32.825	16.5125	35.5	32.5	33	31	33	16.6	32.8	54.4	46.8	51.4	46.35	23.275
	52	42.6	52	47.3	43.125	24.9	30.1	25	26	26.5	29.6625	26	27	24	28	26.25	29.625	34.9	34.6			34.75	40.55
	76	58.1	63	60.55	53.925	25.8	23.1	25	27	25.225	25.8625	25.1	28.8	24	29	26.725	26.4875	59.7	65	70	62.8	64.375	49.5625
	96	60.2		60.2	60.375	28.7	27.4			28.05	26.6375	28.7	31.8			30.25	28.4875	66.2	67.4	74.2	66.9	68.675	66.525
	124	75.7	78	76.85	68.525	22.2	35.5	27	29	28.425	28.2375	28	35.3	22	36	30.325	30.2875	55.7	76.7			66.2	67.4375
	149	75.2	74	74.6	75.725	20.9	28.6	20	24	23.375	25.9	24.3	36.5	13	26	24.95	27.6375	71.4	85.7	68.4	80.3	76.45	71.325
		wt					mtdh1Δ					mtdh1Δmtdh2Δ
32.5ºC	Time (hours)	#1	#2	#3	Average	Moving Average	#1	#2	Average	Moving Average		#1	#2	#3	Average	Moving Average
	0	0.2	0.2	0.21	0.203333		0.2	0.2	0.2			0.2	0.2	0.185	0.195
	0.1				0.2	0.201667			0.2	0.2					0.195	0.195
	22	18.6	8.4	0.965	9.32167	4.76083	1.26	3.1	2.18	1.19		0.4	2.9	0.61	1.30333	0.749167
	28	34.6	20.9	1.345	18.9483	14.135	1.72	6.3	4.01	3.095		0.435	4.9	0.646	1.99367	1.6485
	52	45.1	31.7	17.5	31.4333	25.1908	9.3	13.4	11.35	7.68		0.634	7.3	0.945	2.95967	2.47667
	76			41.3	41.3	36.3667				11.35						2.95967
	102		40.1	46.3	43.2	42.25		16.5	16.5	16.5			14.2	19.1	16.65	16.65
	126	76.6	37		56.8	50	17.9		17.9	17.2		15.3			15.3	15.975
	149			61.9	61.9	59.35		24.4	24.4	21.15			18.3		18.3	16.8

## Sheet: Figure 4C_2FG
30ºC		wt				mtdh1Δ						mdh2						mtdh1Δmtdh2Δ
	Time (hours)	#1	#2	Average	Moving Average	#1	#2	#3	#4	Average	Moving Average	#1	#2	#3	#4	Average	Moving Average	#1	#2	#3	#4	Average	Moving Average
	0	0.2	0.2	0.2		0.2	0.2	0.2	0.2	0.2		0.2	0.2	0.2	0.2	0.2		0.2	0.2	0.2	0.2	0.2
	0.1			0.2	0.2					0.2	0.2					0.2	0.2					0.2	0.2
	24	27.48	33.2	15.27	7.735	20.6	19.6	16.6	15.3	17.1667	8.68333	29.56	20.96	30.3	31.3	28.03	14.115	20.8	22	17.6	17.4	19.45	9.825
	28	32.9	39.8	33.345	24.3075	28.3	32.6	19.5	17.3	23.1333	20.15	32.6	35.5	28.3	31.2	31.9	29.965	30	28.1	19.3	20.5	24.475	21.9625
	52	33.6	41.3	36.9	35.1225	39.9	27.8	33	27.5	29.4333	26.2833	40.3	29.9	36	37.8	36	33.95	24.6	30.6	26.4	29.2	27.7	26.0875
	76	36	36.7	36.9	36.9	41	30.1	31.8	30.4	30.7667	30.1	33.9	27.2	33.5	36.1	32.675	34.3375	22.2	28.5	27.4	25.5	25.9	26.8
	96	31.9	31.9	34.125	35.5125	41	22	31.4	28.7	27.3667	29.0667	22.3	25	35.8	34.1	29.3	30.9875	22.4	30.6	36.6	32.2	30.45	28.175
	124	23.2	32.5	29.875	32	40.2	22.1	30.6	23	25.2333	26.3	23.3	24.9	35.1	34	29.325	29.3125	32.4	24.1	30.7	31.8	29.75	30.1
	149	34	41.4	32.775	31.325	45.4	32.3	30.8	27.9	30.3333	27.7833	26.2	23.5	28.8	31.7	27.55	28.4375	26.2	33.3	36.6	26.4	30.625	30.1875
32,5ºC	wt				mtdh1Δ					mtdh1Δmtdh2Δ
	Time (hours)	#1	Moving average		#1	#2	average	moving average		#1	#2	average	moving average
	0	0.189			0.228	0.2	0.214			0.165	0.214	0.1895
	0.1	0.189	0.189									0.1895	0.1895
	28		0.189					0.214			0.296	0.296	0.24275
	52	27.5	27.5		0.31	0.19	0.25	0.25		0.3	0.314	0.307	0.3015
	76	29.4	28.45		0.32	0.2	0.26	0.255			0.332	0.332	0.3195
	96		29.4		1.274	0.962	1.118	0.689		0.396	0.366	0.381	0.3565

## Sheet: Figure 4D_20FRU
	25ºC		wt		mtdh1Δ				mtdh1Δmtdh2Δ
		Time (hours)	#1	Moving Average	#1	#2	Average	Moving Average	#1	#2	Average	Moving Average
		0	0.2		0.2	0.2	0.2		0.2	0.2	0.2
		0.1	0.2	0.2			0.2	0.2			0.2	0.2
		22	36	18.1	38	26	32	16.1	28	30	29	14.6
		52	73	73	56	65	60.5	46.25	58	63	60.5	44.75
		76	75	74	73	88	80.5	70.5	57	73	65	62.75
		102	116	95.5	92	96	94	87.25	74	92	83	74
		126	102	109	108	80	94	94	122	120	121	102
		150	124	113	106	118	112	103	84	102	93	107
	30ºC		wt		mtdh1Δ
		Time (hours)	#1	Moving Average	#1	#2	Average	Moving Average
		0	0.2		0.2	0.2	0.2
		0.1	0.2	0.2			0.2	0.2
		22	24	12.1	19.2	25.9	22.55	11.375
		28	45	34.5	33.5	31.2	32.35	27.45
		52	34.45	39.725	31.65	21.7	26.675	29.5125
		70	86	60.225	31.5	25.8	28.65	27.6625
		142	103	94.5	27	28.4	27.7	28.175
	32,5ºC		wt		mtdh1Δ				mtdh1Δmtdh2Δ
		Time (hours)	#1	Moving Average	#1	#2	Average	Moving Average	#1	Moving Average
		0	0.143		0.138	0.132	0.135		0.142
		0.1	0.143	0.143			0.135	0.135	0.142	0.142
		22	10.04	5.0915	0.33	4.83	2.58	1.3575	0.45	0.296
		28	14.25	12.145	0.68	7.1	3.89	3.235	0.47	0.46
		52	47.8	31.025	8.8		8.8	6.345	9.9	5.185
		76	52	49.9	23.5	21.9	22.7	15.75	19.1	14.5
		102	55.7	53.85	23	23.2	23.1	22.9	23.9	21.5
		150	77.7	66.7	30.1	28.6	29.35	26.225	31.3	27.6

## Sheet: Figure 4E_20GLU
	25ºC	wt					mtdh1Δ					mtdh1Δmtdh2Δ
		Time (hours)	#1	#2	Mean	Moving Average	Time (hours)	#1	#2	Mean	Moving Average	Time (hours)	#1	#2	Mean	Moving Average
		0	0.2	0.2	0.2		0					0
		0.1				0.2	0.1	0.2	0.2	0.2	0.2	0.1	0.2	0.2	0.2	0.2
		22	44.5	41.5	43	21.6	22	43.5	40.8	42.15	21.175	22	36.1	34.2	35.15	17.675
		29	54	42	48	45.5	29	51	41	46	44.075	29	52	42	47	41.075
		52	73	60.6	66.8	57.4	52	60	63.6	61.8	53.9	52	53	66	59.5	53.25
		76	85	96.2	90.6	78.7	76	82	68.2	75.1	68.45	76	65	58	61.5	60.5
		102	97	93.2	95.1	92.85	102	86	70.2	78.1	76.6	102	70	80	75	68.25
		126	130	81	105.5	100.3	126	110	61	85.5	81.8	126	94	102	98	86.5
		150	134	150	142	123.75	150	120	105	112.5	99	150	90	118	104	101
	30ºC		wt		mtdh1Δ
		Time (hours)	#1	Moving Average	#1	Moving Average
		0	0.2		0.2
		0.1	0.2	0.2	0.2	0.2
		22	20	10.1	18.6	9.4
		28	40	40	36	27.3
		52	55	47.5	35.6	35.8
		70	81	68	35	35.3
		142	115	98	45	40
	32,5ºC		wt		mtdh1Δ		mtdh2Δ
		Time (hours)	#1	Moving Average	#1	Moving Average	#1	Moving Average
		0	0.176		0.11		0.132
		0.1	0.176	0.176	0.11	0.11	0.132	0.132
		22	10.32	5.248	2.35	1.23	1.93	1.031
		28	12.91	12.91	3.96	3.96	3.29	3.29
		52	68.4	40.655	24.1	14.03	17.3	10.295
		76	68.9	68.65	33.5	28.8	22.9	20.1
		102	85.9	77.4	34.9	34.2	32.9	27.9
		150	90.4	88.15	34	34.45	34.3	33.6

## Sheet: Figure 4F
2FG+18%Mannitol		wt					mtdh1Δ						mtdh1Δmtdh2Δ
	Time (hours)	#1	#2	#3	Average	Moving Average	#1	#2	#3	#4	Average	Moving Average	#1	#2	#3	#4	Average	Moving Average
	0	0.2	0.2	0.2	0.2		0.2	0.2	0.2	0.2	0.2		0.2	0.2	0.2	0.2	0.2
	0.1					0.2						0.2						0.2
	24	18.95			18.95	9.575	11.05	9.95			10.5	5.35	13.65	10.75			12.2	6.2
	52	38.1			38.1	28.525	31	36.7			33.85	22.175	41.9	38.3			40.1	26.15
	72	42.5	42.9	42	42.4667	40.2833	32.8	33.8	13.5	15.9	24	28.925	40.1	36.2	27	26	32.325	36.2125
	96	38.6	42		40.3	41.3833	33.3	36.2	23.8		31.1	27.55	42.8	30.4			36.6	34.4625
	120	34.8	34.2	41	36.6667	38.4833	33.7	36	31.6	30.3	32.9	32	40.4	40	34	34.8	37.3	36.95
	150	35			35	35.8333	28.7	41.4			35.05	33.975	37	41			39	38.15
2FG+18%Sorbitol		wt				mtdh1Δ				mtdh1Δmtdh2Δ				mtdh1Δsor1Δ
	Time (hours)	#1	#2	Average	Moving Average	#1	#2	Average	Moving Average	#1	#2	Average	Moving Average	#1	#2	Average	Moving Average
	0	0.2	0.2	0.2		0.2	0.2	0.2		0.2	0.2	0.2		0.2	0.2	0.2
	0.1			0.2	0.2			0.2	0.2			0.2	0.2				0.2
	24		22.6	22.6	7.66667	9	16.9	12.95	6.575	12.5	9.3	10.9	5.55	4.56	5.02	5.02	2.61
	72	40.2	37.1	38.65	38.65	25		25	25	19.8		19.8	19.8
	96	31.4	28.1	29.75	34.2	28.5	28.2	28.35	26.675	23.2		23.2	21.5		19.9	19.9	19.9
	120		39.6	39.6	34.675	26.1		26.1	27.225	32.2	29.6	30.9	27.05	22.4	24.1	24.1	22
	150	37.6	36.4	37	38.3	34.5		34.5	30.3	29.4		29.4	30.15		22.3	22.3	23.2
